# Supplementary material
Source: MDPI journal article supplement (https://www.mdpi.com/2071-1050/14/21/14380)
Supplement: s1 [file s1]

# Supplementary Information

## Different interspecies demographic history within the same locality. The case study of sea cucumber, cuttlefish and clam in the Greek waters

Konstantinos Feidantsis<sup>1\*</sup>, Georgios A. Gkafas<sup>1</sup>, Athanasios Exadactylos<sup>1</sup>, Basile Michaelidis<sup>2</sup>, Alexandra Staikou<sup>3</sup>, Marianthi Hatzioannou<sup>1</sup>, Chrysoula Apostologamvrou<sup>1</sup>, Joanna Sarantopoulou<sup>1</sup>, Dimitris Vafidis<sup>1</sup>

**Table S1.** Number of RAD-seq reads per individual for all species and populations. It is indicated the percentage of the reads that have been mapped to the reference genomes. *Holothuria glaberina* was used for *Holothuria tubulosa*, *Mercenaria mercenaria* for *Venus verrucosa* samples and *Sepia pharaonis* for *Sepia officinalis*

| Species               | Populations | Individuals | Reads    | mapped           |
|-----------------------|-------------|-------------|----------|------------------|
| <i>H. tubulosa</i>    | Pagasitikos | H1PA        | 5853260  | 4934798 (84.31%) |
|                       |             | H1PS        | 2447488  | 2094661 (85.58%) |
|                       |             | H1PW        | 7732194  | 6576761(85.06%)  |
|                       |             | H4PSP       | 1443339  | 1211256(83.92%)  |
|                       |             | H5PA        | 6838597  | 5796517(84.76%)  |
|                       |             | H5PS        | 5919457  | 5083709(85.88%)  |
|                       | Thermaikos  | H1T         | 4932295  | 4179608(84.74%)  |
|                       |             | H2T         | 5019199  | 4258828(84.85%)  |
|                       |             | H3T         | 5098605  | 4330708(84.94%)  |
|                       |             | H4T         | 5011624  | 4251409(84.83%)  |
|                       |             | H5TA        | 9647325  | 8252229(85.54%)  |
|                       | Vistonikos  | H1VS        | 8981207  | 7709035(84.84%)  |
|                       |             | H1VSP       | 2276218  | 1952079(85.76%)  |
|                       |             | H2VSP       | 2910654  | 2427989(83.42%)  |
|                       |             | H5VS        | 4729953  | 4022013(85.03%)  |
|                       |             | H6V         | 4052188  | 3455180(85.27%)  |
| <i>S. officinalis</i> | Pagasitikos | S2PA        | 10176035 | 2119240(20.83%)  |
|                       |             | S2PS        | 6138668  | 1275020(20.77%)  |
|                       |             | S2PW        | 2146346  | 451970(21.6%)    |
|                       |             | S3PA        | 3576183  | 773617(21.63%)   |
|                       |             | S3PSP       | 2090089  | 440268(21.06%)   |
|                       |             | S3PW        | 2718176  | 547462(20.14%)   |
|                       | Thermaikos  | S1TSP       | 2105240  | 444158(21.1%)    |

|                     |             |       |         |                 |
|---------------------|-------------|-------|---------|-----------------|
| <i>V. verrucosa</i> |             | S1TW  | 3000446 | 629416(20.98%)  |
|                     |             | S2TS  | 2258310 | 450455(19.95%)  |
|                     |             | S4TSP | 1906487 | 410536(21.53%)  |
|                     |             | S4TW  | 2561283 | 548119(21.4%)   |
|                     |             |       |         |                 |
|                     | Vistonikos  | S2VA  | 4951637 | 1046338(21.13%) |
|                     |             | S2VW  | 2344703 | 513916(21.92%)  |
|                     |             | S3VA  | 1662960 | 348552(20.96%)  |
|                     |             | S3VS  | 1588804 | 334005(21.02%)  |
|                     |             | S23VW | 2133266 | 448066(21%)     |
|                     |             |       |         |                 |
|                     | Pagasitikos | V1PA  | 6385616 | 4120243(64.52%) |
|                     |             | V1PS  | 1804258 | 1050476(58.22%) |
|                     |             | V1PSP | 2301364 | 1393305(60.54%) |
|                     |             | V5PSP | 3140219 | 2116740(67.41%) |
|                     |             | V5PW  | 2205105 | 1346926(61.08%) |
|                     |             |       |         |                 |
|                     | Thermaikos  | V1TA  | 2008451 | 1283780(63.92%) |
|                     |             | V1TW  | 2962411 | 1695602(57.24%) |
|                     |             | V5T   | 2971680 | 1780557(59.92%) |
|                     |             | V5TS  | 4020126 | 2336170(58.11%) |
|                     |             | V5TSP | 2545907 | 1472597(57.84%) |
|                     |             |       |         |                 |
|                     | Vistonikos  | V1VA  | 3953531 | 2335664(59.08%) |
|                     |             | V1VS  | 2115597 | 1183302(55.93%) |
|                     |             | V2VSP | 2393752 | 1413086(59.03%) |
|                     |             | V4V   | 2992297 | 1730986(57.85%) |
|                     |             | V5V   | 2253930 | 1297470(57.56%) |

**Table S2.** Filtering steps that were carried out to generate the final high-quality SNP dataset starting from the raw SNPs output by the GATK pipeline. The number of retained SNPs after each step is reported. GQ: Genotype quality; DP: Genotype depth of coverage; IGR: Individual genotyping rate; maxDP: Depth of coverage (twice the mean depth of coverage of the raw dataset) greater than 416.24 for *H. tubulosa*, 176.62 for *S. officinalis* and 21.76 for *V. verrucosa*, were removed; MAF: Minimum Allele Frequency; hwe: Hardy-Weinberg equilibrium; ld r<sup>2</sup>: Linkage Disequilibrium pruning r<sup>2</sup>.

| <b>Filtering</b>        | <b><i>H. tubulosa</i></b> | <b><i>S. officinalis</i></b> | <b><i>V. verrucosa</i></b> |
|-------------------------|---------------------------|------------------------------|----------------------------|
| Raw SNPs                | 5,274,813                 | 71,171                       | 799,035                    |
| Biallelic SNPs          | 4,450,085                 | 56,460                       | 719,636                    |
| GQ > 5                  | 4,450,085                 | 56,460                       | 719,636                    |
| DP > 5                  | 4,450,085                 | 56,460                       | 719,636                    |
| IGR > 80%               | 37,030                    | 2,341                        | 5,162                      |
| maxDP                   | 37,021                    | 2,320                        | 5,150                      |
| MAF > 0.05              | 16,306                    | 1,228                        | 3,477                      |
| Hwe p-value > 0.05      | 16,306                    | 1,083                        | 3,477                      |
| ld r <sup>2</sup> < 0.5 | 16,142                    | 1,083                        | 3,477                      |

**Table S3.** Confidence intervals for ABC analysis for *Holothuria tubulosa* populations for both direct and logistic regression of the scenarios comparison.

| Species     | Population  |                     | Scenario1        | Scenario2 | Scenario3 | Scenario4 |       |
|-------------|-------------|---------------------|------------------|-----------|-----------|-----------|-------|
| H. tubulosa | Pagasitikos | Direct Regression   | Regression value | 0         | 0.580     | 0         | 0.420 |
|             |             |                     | 95% CI low       | 0         | 0.147     | 0         | 0     |
|             |             |                     | 95% CI high      | 0         | 1         | 0         | 0.853 |
|             |             | Logistic Regression | Regression value | 0.014     | 0.523     | 0.008     | 0.455 |
|             |             |                     | 95% CI low       | 0.009     | 0.518     | 0.004     | 0.449 |
|             |             |                     | 95% CI high      | 0.018     | 0.528     | 0.013     | 0.460 |
|             | Thermaikos  | Direct Regression   | Regression value | 0         | 0.616     | 0         | 0.384 |
|             |             |                     | 95% CI low       | 0         | 0.189     | 0         | 0     |
|             |             |                     | 95% CI high      | 0         | 1         | 0         | 0.810 |
|             |             | Logistic Regression | Regression value | 0         | 0.796     | 0         | 0.203 |
|             |             |                     | 95% CI low       | 0         | 0.739     | 0         | 0.146 |
|             |             |                     | 95% CI high      | 0         | 0.854     | 0         | 0.261 |
|             | Vistonikos  | Direct Regression   | Regression value | 0         | 0.552     | 0         | 0.448 |
|             |             |                     | 95% CI low       | 0         | 0.116     | 0         | 0.012 |
|             |             |                     | 95% CI high      | 0         | 0.988     | 0         | 0.884 |
|             |             | Logistic Regression | Regression value | 0         | 0.515     | 0         | 0.485 |
|             |             |                     | 95% CI low       | 0         | 0.509     | 0         | 0.480 |
|             |             |                     | 95% CI high      | 0         | 0.520     | 0         | 0.491 |

**Table S4.** Confidence intervals for ABC analysis for *Sepia officinalis* populations for both direct and logistic regression of the scenarios comparison.

| Species               | Population  |                                | Scenario1 | Scenario2 | Scenario3 | Scenario4 |
|-----------------------|-------------|--------------------------------|-----------|-----------|-----------|-----------|
| <i>S. officinalis</i> | Pagasitikos | Regression value               | 0.006     | 0.018     | 0.924     | 0.052     |
|                       |             | Direct Regression 95% CI low   | 0         | 0         | 0.692     | 0         |
|                       |             | 95% CI high                    | 0.074     | 0.135     | 1         | 0.247     |
|                       |             | Regression value               | 0         | 0.025     | 0.917     | 0.056     |
|                       |             | Logistic Regression 95% CI low | 0         | 0.025     | 0.911     | 0.052     |
|                       |             | 95% CI high                    | 0         | 0.025     | 0.922     | 0.061     |
|                       | Thermaikos  | Regression value               | 0.014     | 0.306     | 0.456     | 0.224     |
|                       |             | Direct Regression 95% CI low   | 0         | 0         | 0.019     | 0         |
|                       |             | 95% CI high                    | 0.117     | 0.709     | 0.893     | 0.589     |
|                       |             | Regression value               | 0.016     | 0.263     | 0.462     | 0.259     |
|                       |             | Logistic Regression 95% CI low | 0.013     | 0.258     | 0.456     | 0.255     |
|                       |             | 95% CI high                    | 0.019     | 0.268     | 0.467     | 0.263     |
|                       | Vistonikos  | Regression value               | 0         | 0.078     | 0.844     | 0.078     |
|                       |             | Direct Regression 95% CI low   | 0         | 0         | 0.526     | 0         |
|                       |             | 95% CI high                    | 0         | 0.313     | 1         | 0.313     |
|                       |             | Regression value               | 0.004     | 0.034     | 0.922     | 0.039     |
|                       |             | Logistic Regression 95% CI low | 0.002     | 0.031     | 0.917     | 0.036     |
|                       |             | 95% CI high                    | 0.007     | 0.037     | 0.927     | 0.043     |

**Table S5.** Confidence intervals for ABC analysis for *Venus verrucosa* populations for both direct and logistic regression of the scenarios comparison.

| Species             | Population  |                                | Scenario1 | Scenario2 | Scenario3 | Scenario4 |
|---------------------|-------------|--------------------------------|-----------|-----------|-----------|-----------|
| <i>V. verrucosa</i> | Pagasitikos | Regression value               | 0.900     | 0.02      | 0         | 0.080     |
|                     |             | Direct Regression 95% CI low   | 0.637     | 0         | 0         | 0         |
|                     |             | 95% CI high                    | 1         | 0.142     | 0         | 0.318     |
|                     |             | Regression value               | 0.921     | 0.024     | 0.025     | 0.029     |
|                     |             | Logistic Regression 95% CI low | 0.913     | 0.021     | 0.025     | 0.022     |
|                     |             | 95% CI high                    | 0.928     | 0.027     | 0.025     | 0.038     |
|                     | Thermaikos  | Regression value               | 0.520     | 0.020     | 0.260     | 0.200     |
|                     |             | Direct Regression 95% CI low   | 0.082     | 0         | 0         | 0         |
|                     |             | 95% CI high                    | 0.958     | 0.143     | 0.645     | 0.551     |
|                     |             | Regression value               | 0.956     | 0.024     | 0.016     | 0.003     |
|                     |             | Logistic Regression 95% CI low | 0.934     | 0         | 0         | 0         |
|                     |             | 95% CI high                    | 0.979     | 0.521     | 0.539     | 0.511     |
|                     | Vistonikos  | Regression value               | 0.880     | 0         | 0.08      | 0.04      |
|                     |             | Direct Regression 95% CI low   | 0.595     | 0         | 0         | 0         |
|                     |             | 95% CI high                    | 1         | 0         | 0.318     | 0.212     |
|                     |             | Regression value               | 0.905     | 0.003     | 0.043     | 0.048     |
|                     |             | Logistic Regression 95% CI low | 0.898     | 0.001     | 0.039     | 0.044     |
|                     |             | 95% CI high                    | 0.912     | 0.005     | 0.048     | 0.054     |

**Table S6.** Mean values of temperature, salinity and oxygen recorded during seasonal samplings.

| Temperature<br>(°C) |             | Chl- $\alpha$<br>(mg m <sup>-3</sup> ) |             | Salinity (psu) |             |
|---------------------|-------------|----------------------------------------|-------------|----------------|-------------|
|                     | Pagositikos |                                        | Pagositikos |                | Pagositikos |
| Apr                 | 14          | Apr                                    | 0.889       | Apr            | 37.97       |
| Jun                 | 21          | Jun                                    | 0.451       | Jun            | 35.86       |
| Nov                 | 18          | Nov                                    | 1.205       | Nov            | 37.36       |
| Jan                 | 14          | Jan                                    | 1.081       | Jan            | 38.55       |
|                     | Thermaikos  |                                        | Thermaikos  |                | Thermaikos  |
| Apr                 | 14          | Apr                                    | 1.871       | Apr            | 37.92       |
| Jun                 | 21          | Jun                                    | 1.021       | Jun            | 35.39       |
| Nov                 | 18          | Nov                                    | 1.346       | Nov            | 37.44       |
| Jan                 | 13          | Jan                                    | 1.467       | Jan            | 38.35       |
|                     | Vistonikos  |                                        | Vistonikos  |                | Vistonikos  |
| Apr                 | 12          | Apr                                    | 0.324       | Apr            | 38.06       |
| Jun                 | 19          | Jun                                    | 0.223       | Jun            | 35.96       |
| Nov                 | 17          | Nov                                    | 0.496       | Nov            | 37.55       |
| Jan                 | 11          | Jan                                    | 0.581       | Jan            | 38.39       |

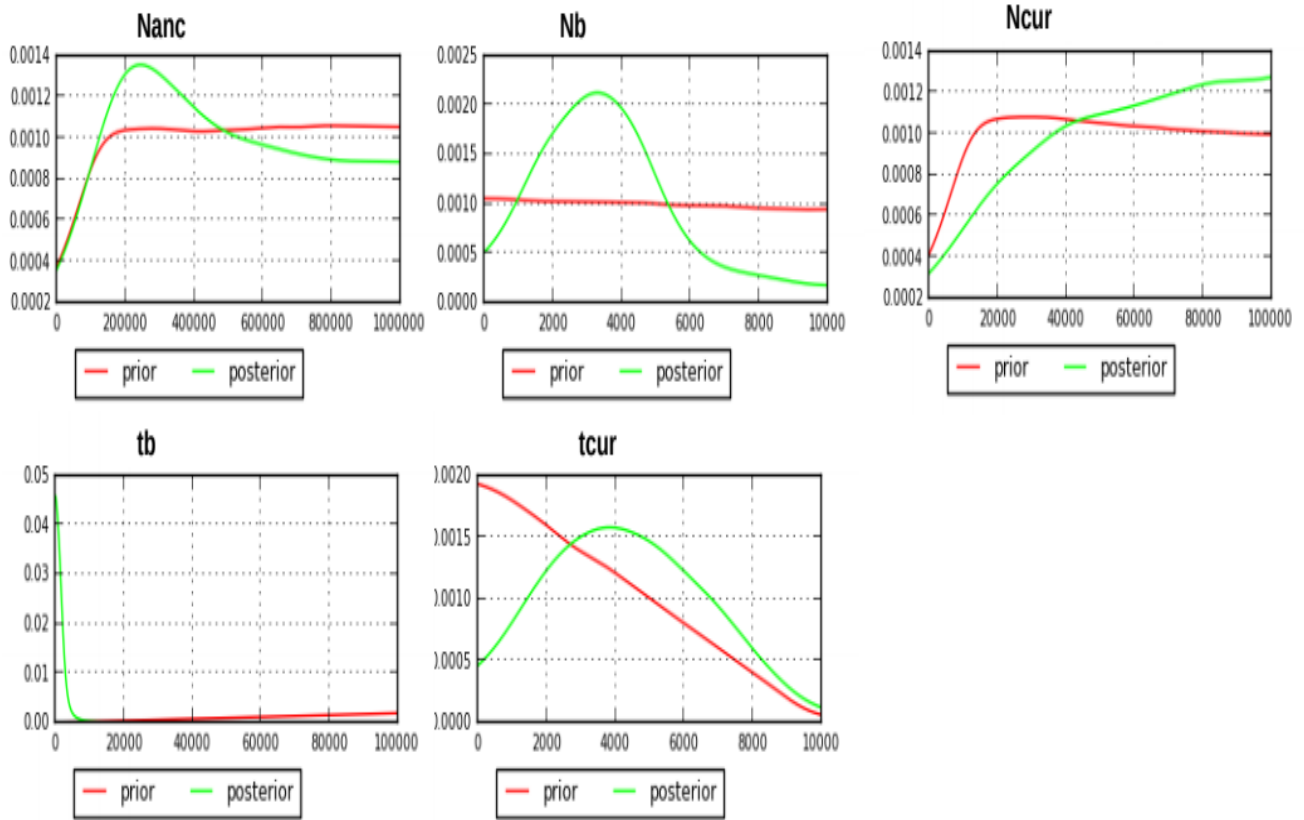

**Figure S1.** Posterior (green line) and prior (red line) distribution plots of ABC analysis based on  $4 \times 10^6$  simulated data sets of historical effective population sizes and time of historical events based on scenario 2 of *H. tubulosa* for Pagasitikos population;  $N_{anc}$ : Ancestral population,  $N_b$ : bottlenecked population,  $N_{cur}$ : recovered population,  $t_b$ : time of bottleneck event,  $t_{cur}$ : time of recovery



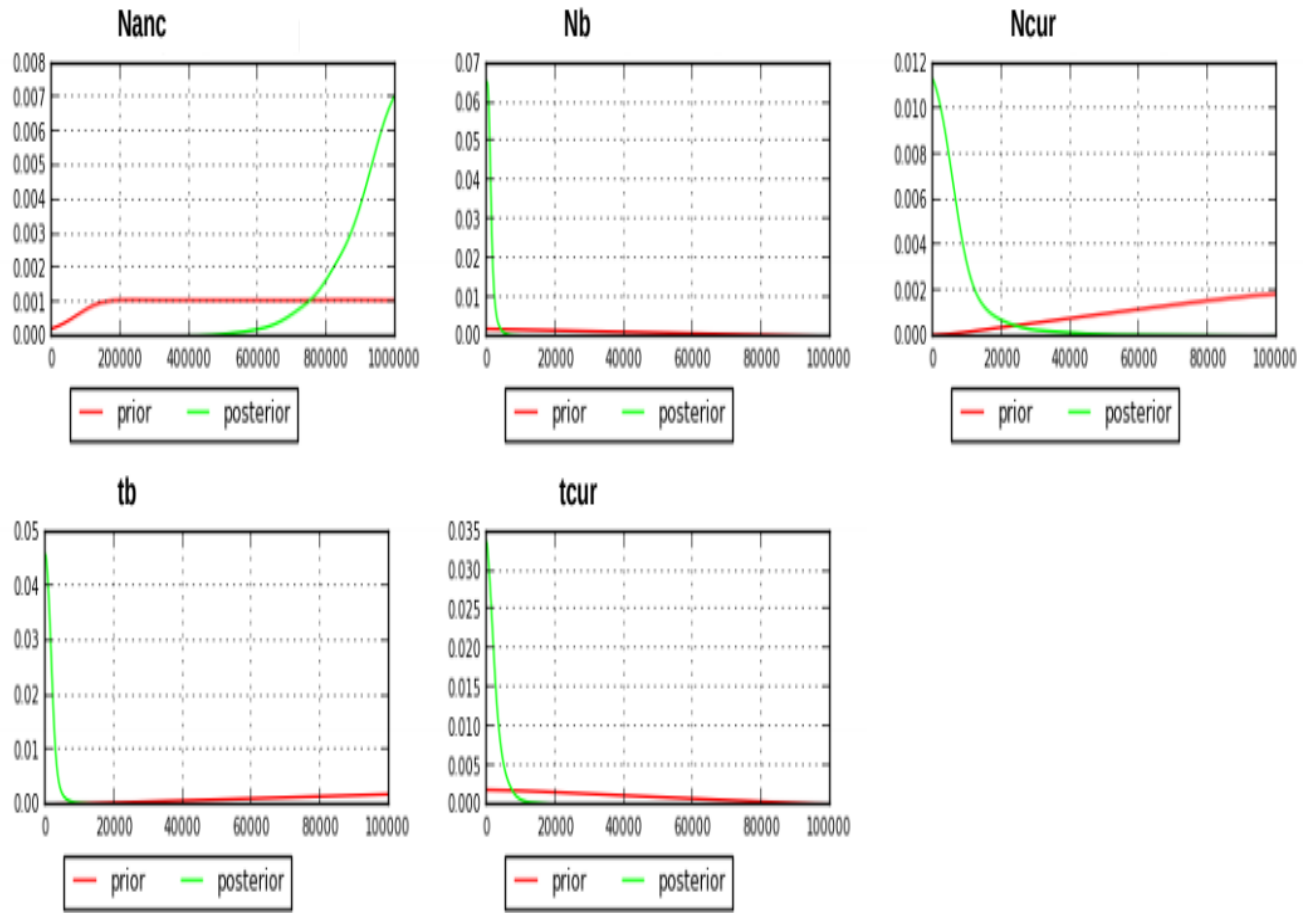

**Figure S2.** Posterior (green line) and prior (red line) distribution plots of ABC analysis based on  $4 \times 10^6$  simulated data sets of historical effective population sizes and time of historical events based on scenario 2 of *H. tubulosa* for Thermaikos population;  $N_{anc}$ : Ancestral population,  $N_b$ : bottlenecked population,  $N_{cur}$ : recovered population,  $t_b$ : time of bottleneck event,  $t_{cur}$ : time of recovery

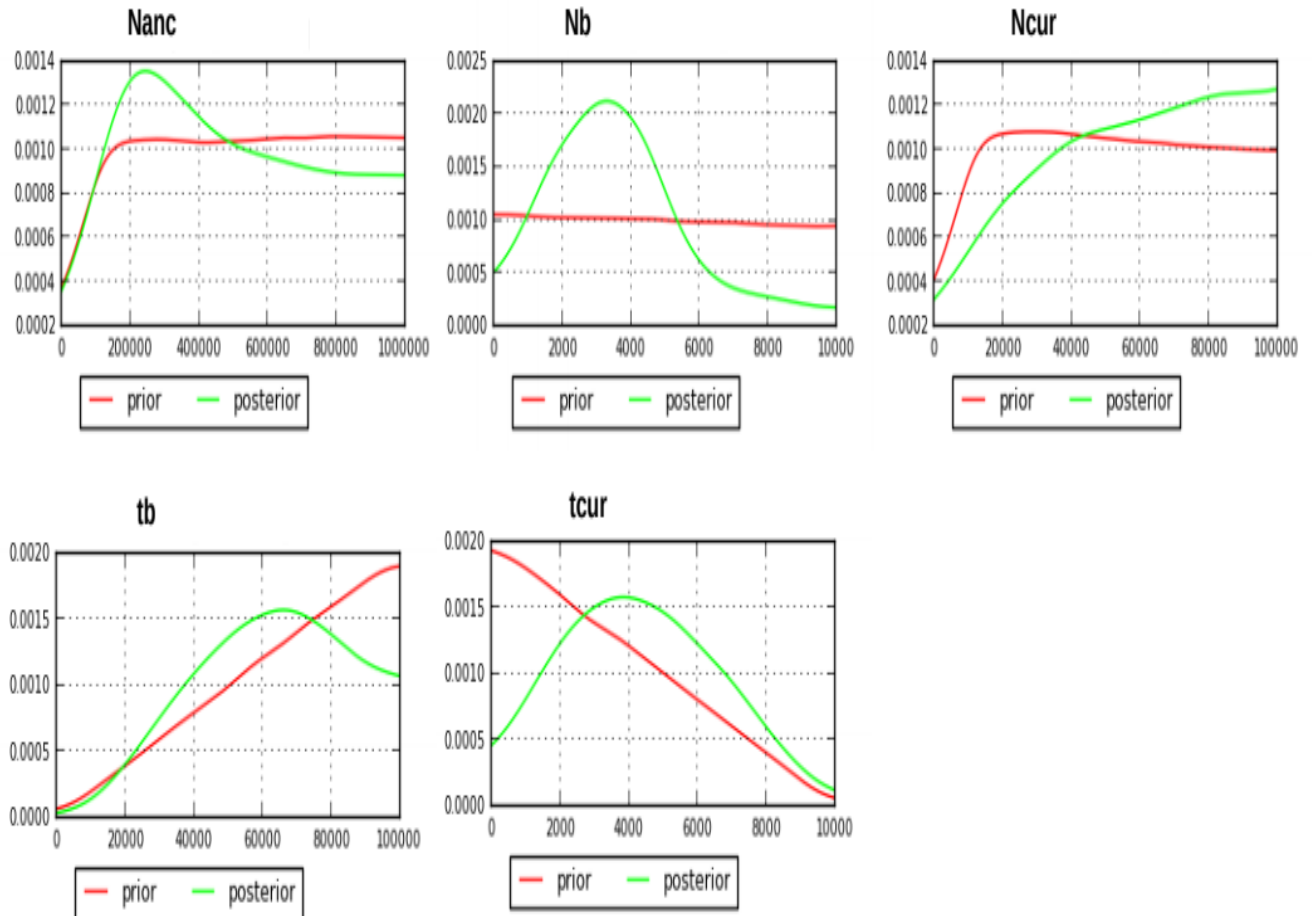

**Figure S3.** Posterior (green line) and prior (red line) distribution plots of ABC analysis based on  $4 \times 10^6$  simulated data sets of historical effective population sizes and time of historical events based on scenario 2 of *H. tubulosa* for Vistonikos population;  $N_{anc}$ : Ancestral population,  $N_b$ : bottlenecked population,  $N_{cur}$ : recovered population,  $t_b$ : time of bottleneck event,  $t_{cur}$ : time of recovery

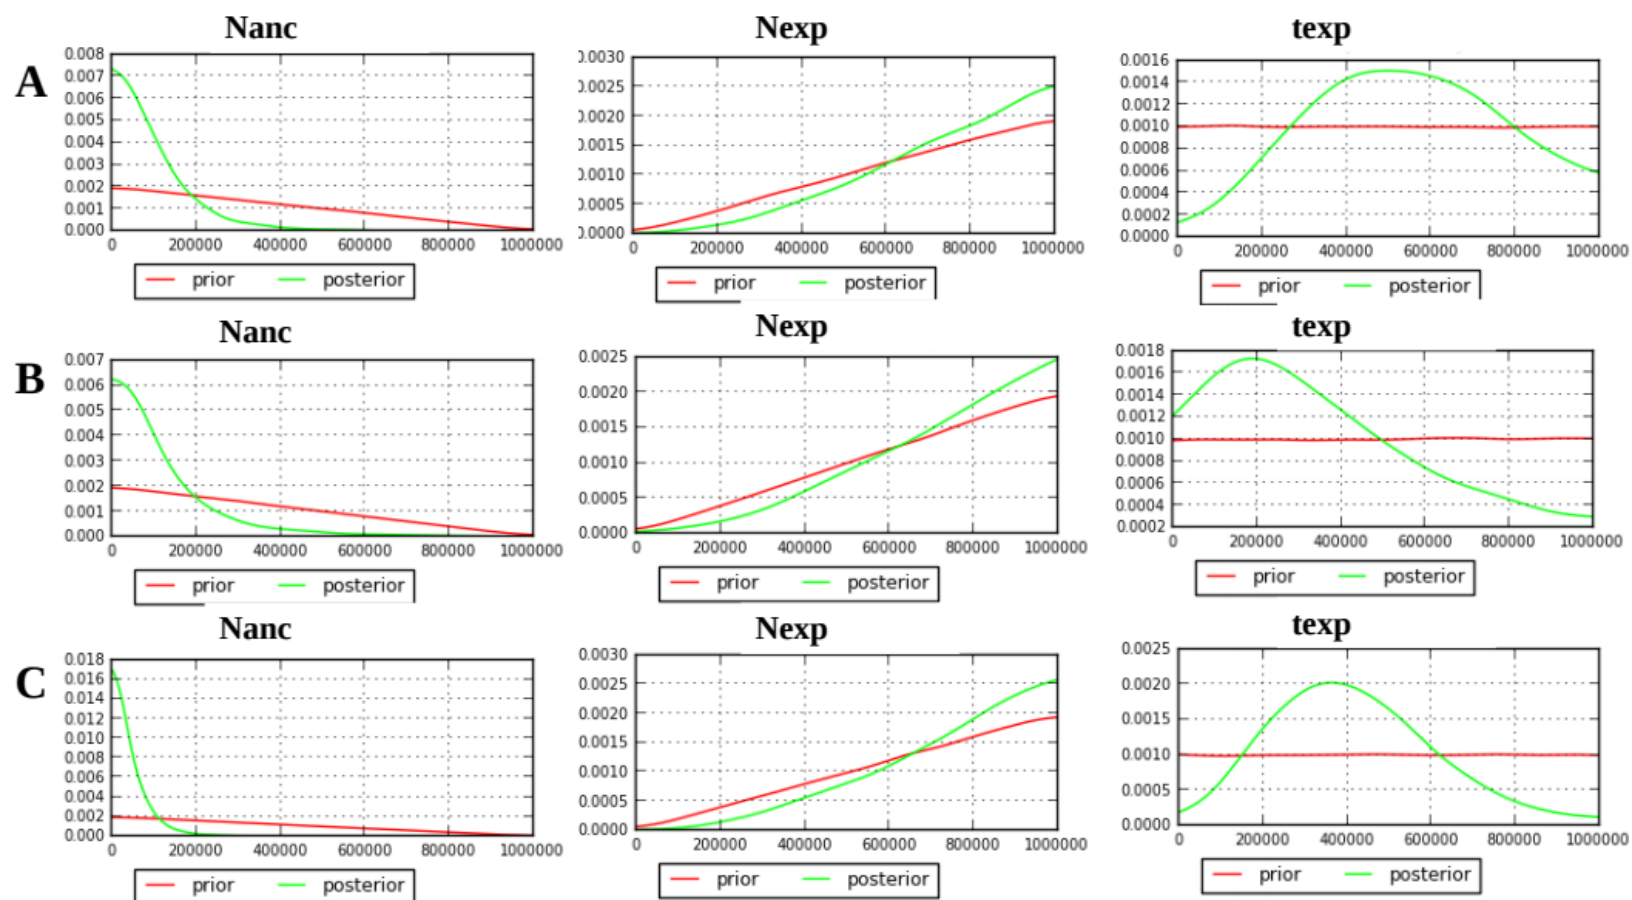

**Figure S4.** Posterior (green line) and prior (red line) distribution plots of ABC analysis based on  $4 \times 10^6$  simulated data sets of historical effective population sizes and time of historical events based on scenario 3 of *S. officinalis* for Pagasitikos (A), Thermaikos (B) and Vistonikos (C) population;  $N_{anc}$ : Ancestral population,  $N_{exp}$ : expanded population,  $t_{exp}$ : time of expansion

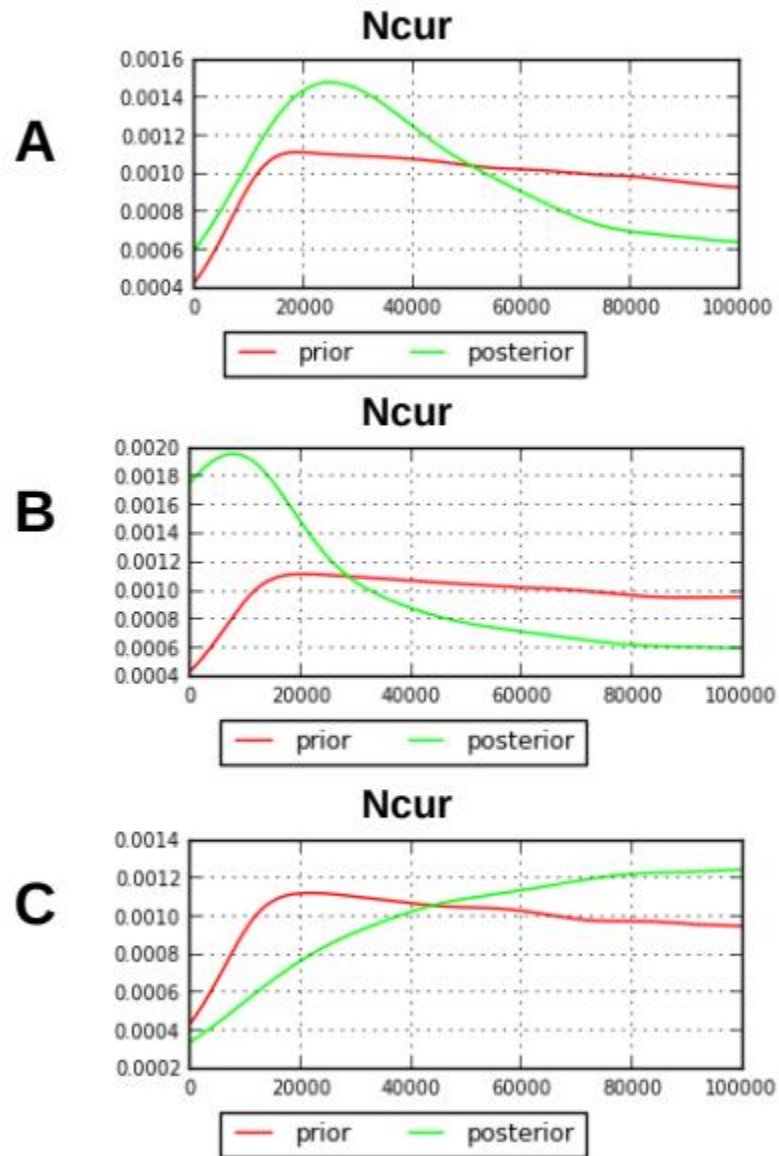

**Figure S5.** Posterior (green line) and prior (red line) distribution plots of ABC analysis based on  $4 \times 10^6$  simulated data sets of historical effective population sizes and time of historical events based on scenario 1 of *V. verrucosa* for Pagasitikos (A), Thermaikos (B) and Vistonikos (C) population;  $N_{cur}$ : constant population effective size

**Table S7.** Genetic indices per species and population. No: Number of alleles; Ea: Effective alleles; H<sub>OBS</sub>: observed heterozygosity; H<sub>EXP</sub>: expected heterozygosity, F<sub>IS</sub>: fixation inbreeding index

| Holothuria | Pop ID      | No    | Ea    | H <sub>OBS</sub> | H <sub>EXP</sub> | F <sub>IS</sub>  |
|------------|-------------|-------|-------|------------------|------------------|------------------|
|            | Pagasitikos | 29946 | 1.295 | 0.120 +/- 0.001  | 0.228 +/- 0.001  | 0.362 +/- 0.002  |
|            | Vistonida   | 14344 | 1.229 | 0.158 +/- 0.001  | 0.186 +/- 0.001  | 0.124 +/- 0.002  |
|            | Thermaikos  | 1817  | 1.223 | 0.338 +/- 0.002  | 0.183 +/- 0.001  | -0.234 +/- 0.002 |
| Sepia      | Pop_ID      | No    | Ea    | H <sub>OBS</sub> | H <sub>EXP</sub> | F <sub>IS</sub>  |
|            | Pagasitikos | 212   | 1.515 | 0.531 +/- 0.011  | 0.340 +/- 0.005  | -0.016 +/- 0.035 |
|            | Thermaikos  | 195   | 1.494 | 0.486 +/- 0.013  | 0.331 +/- 0.006  | 0.047 +/- 0.043  |
|            | Vistonida   | 114   | 1.414 | 0.476 +/- 0.013  | 0.293 +/- 0.006  | -0.010 +/- 0.033 |
| Venus      | Pop_ID      | No    | Ea    | H <sub>OBS</sub> | H <sub>EXP</sub> | F <sub>IS</sub>  |
|            | Pagasitikos | 450   | 1.285 | 0.296 +/- 0.005  | 0.222 +/- 0.003  | -0.095 +/- 0.009 |
|            | Thermaikos  | 388   | 1.285 | 0.309 +/- 0.005  | 0.222 +/- 0.003  | -0.121 +/- 0.010 |
|            | Vistonida   | 393   | 1.295 | 0.321 +/- 0.006  | 0.228 +/- 0.003  | -0.135 +/- 0.008 |

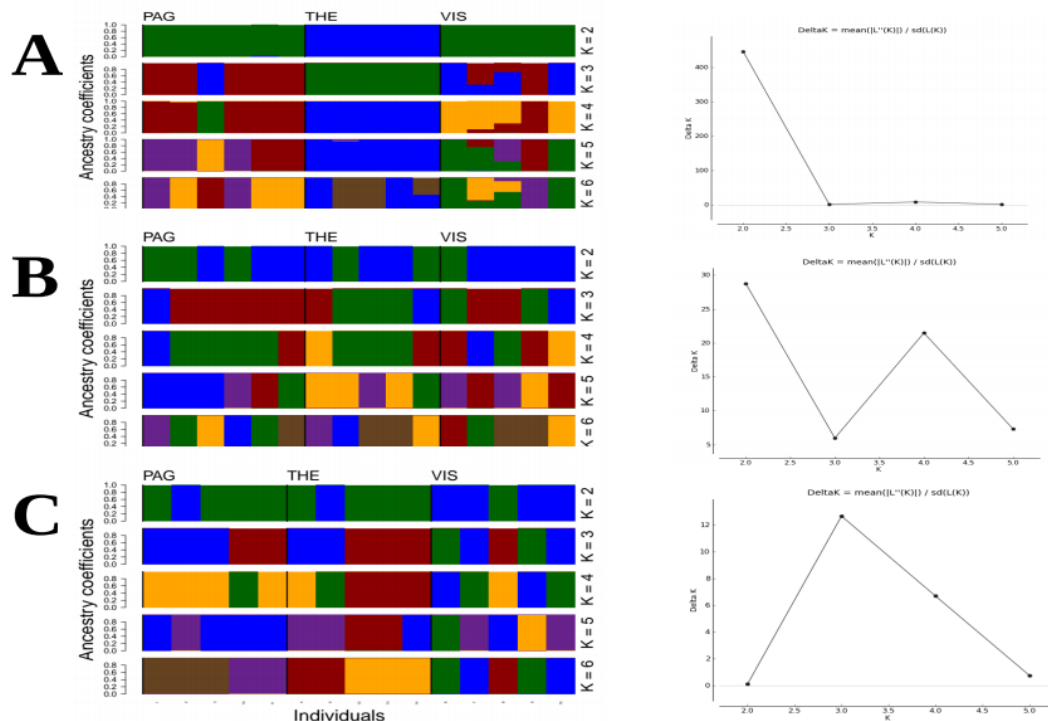

**Figure S6.** Structure plots and Delta-K against K for Structure run given the reduction of Ln from K = 2 for all populations made using HARVESTER. A: Holothuria; B: Sepia; C: Venus
